# Supplementary material
Source: PubMed Central journal article supplement (PMC3540127)
Supplement: NIHMS417405-supplement-01.pdf [file NIHMS417405-supplement-01.pdf]

**1.0 Supplemental Methods**

First, each subject’s FA map was nonlinearly registered to a high-resolution standard space image provided in FSL (FMRIB58_FA) using FMRIB’s Non-linear Image Registration Tool (FNIRT; (Andersson et al., 2007a, b). The FMRIB58_FA image is an average of 58 well-aligned high quality FA images comprised of healthy men and women ranging in age from 20-50 years. Aligned FA images were then averaged to create a group-wise mean FA map. Next, a white matter skeleton, representing only the major tracts that are common across all subjects, was created (Smith et al., 2006; Smith et al., 2007). A mean FA threshold of 0.2 was applied to the white matter skeleton to minimize partial volume effects (Smith et al., 2006). Finally, each subject’s aligned FA image was projected onto the white matter skeleton for subsequent voxelwise group statistics. Major white matter tracts were filled and identified using Johns Hopkins University (JHU) white matter tract atlas (Wakana et al., 2007).

**1.1 Voxel-wise analysis**

Voxel-wise statistics were performed using a FSL’s ‘randomise’ tool, which is a permutation-based inference tool for nonparametric statistical thresholding (Smith et al., 2006), to compare FA values in patients and controls along the main white matter tracts. Age was entered into the design matrix as a nuisance covariate. Control-patient and patient-control contrasts were tested using 10,000 permutations. The significance threshold for between-group differences was set at p < 0.05, corrected for multiple comparisons across voxels using the threshold-free cluster-enhancement (TFCE) option in the “randomise” permutation-testing tool in FSL (Smith et al., 2007). Mean FA values were extracted from the significant between-group FA clusters for each individual to examine the difference between patients and controls. These FA values were then correlated with the accuracy and speed variability scores in the groups as a whole and within each diagnostic group from the CNB using a partial Pearsons’s correlation accounting for age and using an alpha value of p<.01 to control for multiple correlations. In addition, exploratory whole-brain voxelwise statistics were performed in the subset of controls and patients who completed the CNB using the same methods described above.

**References**

Andersson, J.L.R., Jenkinson, M., Smith, S., 2007a. Non-linear optimisation, FMRIB technical report TR07JA1.

Andersson, J.L.R., Jenkinson, M., Smith, S., 2007b. Non-linear registration, FMRIB technical report TR07JA2.

Smith, S.M., Jenkinson, M., Johansen-Berg, H., Rueckert, D., Nichols, T.E., Mackay, C.E., Watkins, K.E., Ciccarelli, O., Cader, M.Z., Matthews, P.M., Behrens, T.E., 2006. Tract-based spatial statistics: voxelwise analysis of multi-subject diffusion data. Neuroimage 31(4), 1487-1505.

Smith, S.M., Johansen-Berg, H., Jenkinson, M., Rueckert, D., Nichols, T.E., Miller, K.L., Robson, M.D., Jones, D.K., Klein, J.C., Bartsch, A.J., Behrens, T.E., 2007. Acquisition and voxelwise analysis of multi-subject diffusion data with tract-based spatial statistics. Nat Protoc 2(3), 499-503.

Wakana, S., Caprihan, A., Panzenboeck, M.M., Fallon, J.H., Perry, M., Gollub, R.L., Hua, K., Zhang, J., Jiang, H., Dubey, P., Blitz, A., van Zijl, P., Mori, S., 2007. Reproducibility of quantitative tractography methods applied to cerebral white matter. Neuroimage 36(3), 630-644.
